# Supplementary material for: Formation of a stable dicarbenoid and an unsaturated C2P2S2 ring from two-electron oxidation of the [C(PPh2S)2]2− dianion
Source: Royal Society of Chemistry journal article supplement (doi:10.1039/b810796c), 2008-01-01
Supplement: b810796c.pdf [file b810796c.pdf]

## Supplementary information

### Formation of a stable dicarbenoid and an unsaturated C<sub>2</sub>P<sub>2</sub>S<sub>2</sub> ring from two-electron oxidation of the [C(PPh<sub>2</sub>S)<sub>2</sub>]<sup>2-</sup> dianion

Jari Konu and Tristram Chivers\*

*University of Calgary, Department of Chemistry, 2500 University Drive N.W., T2N 1N4 Calgary, AB, Canada. Tel: +1-403-220-5741, Fax: +1-403-289-9488, e-mail: chivers@ucalgary.ca*

**General Procedures.** All reactions and the manipulations of products were performed under an argon atmosphere by using standard Schlenk techniques or an inert atmosphere glove box. The compounds (Ph<sub>2</sub>P)<sub>2</sub>CH<sub>2</sub> (Aldrich, 97%), MeLi (1.6 M sol. in Et<sub>2</sub>O, Aldrich), I<sub>2</sub> (Aldrich, 99.99+%) and 12-Crown-4 (Alfa Aesar, 98%) were used as received. The dianion Li<sub>2</sub>[C(PPh<sub>2</sub>S)<sub>2</sub>] (**3**) was prepared by a literature method and was used *in situ*.<sup>1, 2</sup> The solvents Et<sub>2</sub>O and toluene were dried by distillation over Na/benzophenone under an argon atmosphere prior to use.

**Spectroscopic Methods.** The <sup>1</sup>H, <sup>7</sup>Li, <sup>13</sup>C and <sup>31</sup>P NMR spectra were obtained in CD<sub>2</sub>Cl<sub>2</sub> or d<sub>8</sub>-THF on a Bruker DRX 400 spectrometer operating at 399.59, 155.30, 100.49 and 161.77 MHz, respectively. <sup>1</sup>H and <sup>13</sup>C spectra are referenced to the solvent signal and the chemical shifts are reported relative to (CH<sub>3</sub>)<sub>4</sub>Si. <sup>7</sup>Li and <sup>31</sup>P NMR spectra were referenced externally and the chemical shifts are reported relative to a 1.0 M solution of LiCl in D<sub>2</sub>O and to an 85% solution of H<sub>3</sub>PO<sub>4</sub>, respectively.

**X-ray Crystallography.** Yellow, plate-shaped crystals of [(Et<sub>2</sub>O)(μ-Li)][(μ<sub>4</sub>-Li){IC(PPh<sub>2</sub>S)<sub>2</sub>}]<sub>2</sub> (**5**) were obtained from toluene after 24 h at 5 °C while yellow, block-like crystals of [(SPh<sub>2</sub>P)<sub>2</sub>C<sub>2</sub>(PPh<sub>2</sub>)<sub>2</sub>S<sub>2</sub>]·Et<sub>2</sub>O (**6**·Et<sub>2</sub>O) were grown from Et<sub>2</sub>O after 3 d at 23 °C. The crystals were coated with Paratone 8277 oil and mounted on a glass fiber. Diffraction data were collected on a Nonius KappaCCD diffractometer using monochromated MoK<sub>α</sub> radiation (λ = 0.71073 Å) at -100 °C. The data sets were corrected for Lorentz and polarization effects, and empirical absorption correction was applied to the net intensities. The structures were solved by direct methods using SHELXS-97<sup>3</sup> and refined using SHELXL-97.<sup>4</sup> After the full-matrix least-squares refinement of the non-hydrogen atoms with anisotropic thermal parameters, the hydrogen atoms were placed in calculated positions (C-H = 0.95, 0.98 and 0.99 Å for phenyl, CH<sub>3</sub> and CH<sub>2</sub> hydrogens,

respectively). The isotropic thermal parameters of the hydrogen atoms were fixed at 1.2 times to that of the corresponding carbon for phenyl and  $\text{CH}_2$  hydrogens, and 1.5 times for  $\text{CH}_3$  hydrogens. In the final refinement the hydrogen atoms were riding on their respective carbon atoms. Crystallographic data are summarized in Table S1.

**Improved synthesis of 5.** A solution of  $\text{H}_2\text{C}(\text{PPh}_2\text{S})_2$  (0.345 g, 0.77 mmol) in 40 mL of  $\text{Et}_2\text{O}$  was cooled to  $-80^\circ\text{C}$  and 1.00 mL of MeLi (1.6 M in  $\text{Et}_2\text{O}$ , 1.60 mmol, slight excess) was added via syringe. The reaction mixture was stirred for 15 min at  $-80^\circ\text{C}$  and 2 ½ h at  $23^\circ\text{C}$ . To the cloudy solution of  $\text{Li}_2[\text{C}(\text{PPh}_2\text{S})_2]$  a solution of  $\text{I}_2$  (0.203 g, 0.80 mmol) in 30 mL of  $\text{Et}_2\text{O}$  was added at room temperature. The reaction mixture was stirred for ½ h after which a solution of 12-Crown-4 (0.141 g, 0.80 mmol) in 10 mL of  $\text{Et}_2\text{O}$  was added via cannula and stirring was continued for 3 h. The white precipitate was removed by filtration with a PTFE-disk and the solvent was evaporated in vacuo to give a yellow, amorphous powder (0.385 g). Based on  $^{31}\text{P}$  and  $^1\text{H}$  NMR data, the product contains a ca. 9/1 mixture of **5** and  $\text{H}_2\text{C}(\text{PPh}_2\text{S})_2$ , however **6** is not observed. Repeated attempts at further purification of **5** resulted in hydrogen abstraction from solvent(s) and formation of additional  $\text{H}_2\text{C}(\text{PPh}_2\text{S})_2$  as well as  $\text{H}(\text{I})\text{C}(\text{PPh}_2\text{S})_2$ .

**NMR data for  $\text{H}(\text{I})\text{C}(\text{PPh}_2\text{S})_2$ :**  $^{31}\text{P}$  NMR ( $\text{d}_8$ -THF):  $\delta$  49.2 ppm.  $^1\text{H}$  NMR;  $\delta$  6.05 ppm (t, 1H bonded to PCP-carbon,  $^2J(^1\text{H}, ^{31}\text{P}) = 7.2$  Hz).  $^{13}\text{C}\{^1\text{H}\}$  NMR;  $\delta$  26.5 ppm (t, PCP-carbon,  $^1J(^{13}\text{C}, ^{31}\text{P}) = 31.2$  Hz).

cf. NMR data for  $\text{H}(\text{Cl})\text{C}(\text{PPh}_2\text{S})_2$ :  $^{31}\text{P}$  NMR ( $\text{d}_8$ -THF):  $\delta$  46.3 ppm.  $^1\text{H}$  NMR;  $\delta$  5.55 ppm (t, 1H bonded to PCP-carbon,  $^2J(^1\text{H}, ^{31}\text{P}) = 8.9$  Hz).  $^{13}\text{C}\{^1\text{H}\}$  NMR;  $\delta$  53.7 ppm (t, PCP-carbon,  $^1J(^{13}\text{C}, ^{31}\text{P}) = 31.2$  Hz)].<sup>5</sup>

**Improved synthesis of 6.** A solution of  $\text{H}_2\text{C}(\text{PPh}_2\text{S})_2$  (0.169 g, 0.38 mmol) in 40 mL of  $\text{Et}_2\text{O}$  was cooled to  $-80^\circ\text{C}$  and 0.50 mL of MeLi (1.6 M in  $\text{Et}_2\text{O}$ , 0.80 mmol, slight excess) was added via syringe. The reaction mixture was stirred for 15 min at  $-80^\circ\text{C}$  and 2 ½ h at  $23^\circ\text{C}$ .

The turbid solution of  $\text{Li}_2[\text{C}(\text{PPh}_2\text{S})_2]$  was cooled to  $-80^\circ\text{C}$  and a mixture of  $\text{I}_2$  (0.102 g, 0.40 mmol) and 12-Crown-4 (0.141 g, 0.80 mmol) in 30 mL of  $\text{Et}_2\text{O}$  was added via cannula. The reaction mixture was stirred for ½ h at  $-80^\circ\text{C}$  and 3 h at  $23^\circ\text{C}$ . The pale yellow precipitate was removed by filtration with a PTFE-disk and the solvent was evaporated under vacuum to give a yellow, amorphous powder (0.142 g). Based on  $^{31}\text{P}$  and  $^1\text{H}$  NMR data, this procedure produces a mixture of **6**,  $\text{H}_2\text{C}(\text{PPh}_2\text{S})_2$  and  $\text{H}(\text{I})\text{C}(\text{PPh}_2\text{S})_2$  in an approximately 2:1:1 ratio; the dicarbenoid **5** is not observed. However, it was not possible to separate a pure sample of **6** from the other products.

**Table S1.** Crystallographic data for  $[(\text{Et}_2\text{O})(\mu\text{-Li})][(\mu_4\text{-Li})\{\text{IC}(\text{PPh}_2\text{S})_2\}_2]$  (**5**) and  $[(\text{SPh}_2\text{P})_2\text{C}_2(\text{PPh}_2)_2\text{S}_2]\cdot\text{Et}_2\text{O}$  (**6**· $\text{Et}_2\text{O}$ ).<sup>a</sup>

|                                             | <b>5</b>                                                               | <b>6</b> · $\text{Et}_2\text{O}$                  |
|---------------------------------------------|------------------------------------------------------------------------|---------------------------------------------------|
| empirical formula                           | $\text{C}_{54}\text{H}_{50}\text{I}_2\text{Li}_2\text{OP}_4\text{S}_4$ | $\text{C}_{54}\text{H}_{50}\text{OP}_4\text{S}_4$ |
| fw                                          | 1234.74                                                                | 967.06                                            |
| cryst. system                               | monoclinic                                                             | monoclinic                                        |
| space group                                 | $C2/c$                                                                 | $P2_1/c$                                          |
| $a$ , Å                                     | 26.997(5)                                                              | 18.496(4)                                         |
| $b$ , Å                                     | 10.517(2)                                                              | 11.907(2)                                         |
| $c$ , Å                                     | 20.050(4)                                                              | 23.533(5)                                         |
| $\alpha$ , deg.                             | 90.00                                                                  | 90.00                                             |
| $\beta$ , deg.                              | 109.28(3)                                                              | 108.68(3)                                         |
| $\gamma$ , deg.                             | 90.00                                                                  | 90.00                                             |
| $V$ , Å <sup>3</sup>                        | 5373(2)                                                                | 4910(2)                                           |
| $Z$                                         | 4                                                                      | 4                                                 |
| $T$ , °C                                    | -100                                                                   | -100                                              |
| $\rho_{\text{calcd}}$ , g/cm <sup>3</sup>   | 1.526                                                                  | 1.308                                             |
| $\mu(\text{Mo K}\alpha)$ , mm <sup>-1</sup> | 1.483                                                                  | 0.363                                             |
| crystal size, mm <sup>3</sup>               | 0.16x0.06x0.02                                                         | 0.20x0.12x0.06                                    |
| $F(000)$                                    | 2472                                                                   | 2024                                              |
| $\Theta$ range, deg                         | 2.99-25.03                                                             | 2.46-25.03                                        |
| reflns collected                            | 8595                                                                   | 16547                                             |
| unique reflns                               | 4707                                                                   | 8634                                              |
| $R_{\text{int}}$                            | 0.0284                                                                 | 0.0432                                            |
| reflns [ $I > 2\sigma(I)$ ]                 | 3694                                                                   | 6137                                              |
| $R_1$ [ $I > 2\sigma(I)$ ] <sup>b</sup>     | 0.0312                                                                 | 0.0484                                            |
| $wR_2$ (all data) <sup>c</sup>              | 0.0629                                                                 | 0.1149                                            |
| GOF on $F^2$                                | 1.057                                                                  | 1.042                                             |
| completeness                                | 0.989                                                                  | 0.997                                             |

<sup>a</sup>  $\lambda$  (MoK $\alpha$ ) = 0.71073 Å. <sup>b</sup>  $R_1 = \Sigma ||F_o| - |F_c|| / \Sigma |F_o|$ . <sup>c</sup>  $wR_2 = [\Sigma w(F_o^2 - F_c^2)^2 / \Sigma wF_o^4]^{1/2}$ .

**Table S2.** Selected bond lengths (Å) and angles (°) in [(Et<sub>2</sub>O)(μ-Li)][(μ<sub>4</sub>-Li){IC(PPh<sub>2</sub>S)<sub>2</sub>}<sub>2</sub>] (**5**) and [(SPh<sub>2</sub>P)<sub>2</sub>C<sub>2</sub>(PPh<sub>2</sub>)<sub>2</sub>S<sub>2</sub>]·Et<sub>2</sub>O (**6**·Et<sub>2</sub>O).

| <b>5<sup>a</sup></b>     |          |                  |          |                  |          |
|--------------------------|----------|------------------|----------|------------------|----------|
| C(1)-I(1)                | 2.147(3) | P(1)-S(1)        | 1.997(1) | Li(1)-S(2)       | 2.512(5) |
| C(1)-P(1)                | 1.750(3) | P(2)-S(2)        | 2.022(1) | Li(2)-S(2)       | 2.461(5) |
| C(1)-P(2)                | 1.745(3) | Li(1)-S(1)       | 2.466(4) | Li(2)···I(1)     | 3.167(1) |
| P(1)-C(1)-P(2)           | 123.8(2) | P(1)-S(1)-Li(1)  | 106.2(1) | S(1)-Li(1)-S(2A) | 99.8(1)  |
| P(1)-C(1)-I(1)           | 111.8(2) | P(2)-S(2)-Li(1)  | 100.9(1) | S(2)-Li(1)-S(2A) | 102.5(3) |
| P(2)-C(1)-I(1)           | 107.3(2) | P(2)-S(2)-Li(2)  | 111.5(1) | S(2)-Li(2)-S(2A) | 105.5(3) |
| C(1)-P(1)-S(1)           | 120.6(1) | S(1)-Li(1)-S(2)  | 117.4(1) | O(1)-Li(2)-      | 127.2(1) |
| C(1)-P(2)-S(2)           | 118.6(1) | S(1)-Li(1)-S(1A) | 119.5(3) | S(2)/S(2A)       |          |
| <b>6·Et<sub>2</sub>O</b> |          |                  |          |                  |          |
| C(1)-P(1)                | 1.762(3) | C(2)-P(4)        | 1.692(3) | P(2)-S(4)        | 2.133(1) |
| C(1)-P(2)                | 1.692(3) | C(2)-S(2)        | 1.769(3) | P(3)-S(3)        | 1.969(1) |
| C(1)-S(2)                | 1.775(3) | P(1)-S(1)        | 1.975(1) | P(4)-S(4)        | 2.137(1) |
| C(2)-P(3)                | 1.766(3) |                  |          |                  |          |
| C(1)-S(2)-C(2)           | 109.1(1) | C(2)-P(4)-S(4)   | 114.7(1) | P(2)-C(1)-S(2)   | 109.0(2) |
| C(1)-P(1)-S(1)           | 114.6(1) | P(2)-S(4)-P(4)   | 102.8(1) | P(3)-C(2)-P(4)   | 124.9(2) |
| C(1)-P(2)-S(4)           | 111.5(1) | P(1)-C(1)-P(2)   | 123.9(2) | P(3)-C(2)-S(2)   | 122.2(2) |
| C(2)-P(3)-S(3)           | 119.2(1) | P(1)-C(1)-S(2)   | 123.3(2) | P(4)-C(2)-S(2)   | 111.4(2) |

<sup>a</sup> Symmetry operation (A): -x, y, 0.5z.

## References

- (1) T. Cantat, N. Mézailles, L. Ricard, Y. Jean and P. Le Floch, *Angew. Chem. Int. Ed.*, 2004, **43**, 6382-6285.
- (2) T. Cantat, L. Ricard, Y. Jean, P. Le Floch and N. Mézailles, *Organometallics*, 2006, **25**, 4965-4976.
- (3) Sheldrick, G. M. SHELXS-97, *Program for Crystal Structure Determination*, University of Göttingen, Germany, **1997**.

- (4) Sheldrick, G. M. SHELXL-97, *Program for Crystal Structure Refinement*, University of Göttingen, Germany, **1997**.
- (5) T. Cantat, X. Jacques, L. Ricard, X. F. Le Goff, N. Mézailles and P. Le Floch, *Angew. Chem. Int. Ed.*, 2007, **46**, 5947.

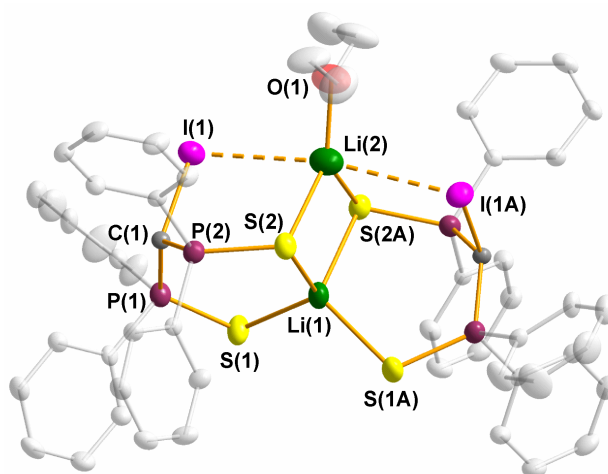

**Figure S1.** Crystal structure of **5** with 50 % thermal ellipsoid. Hydrogen atoms have been omitted for clarity.

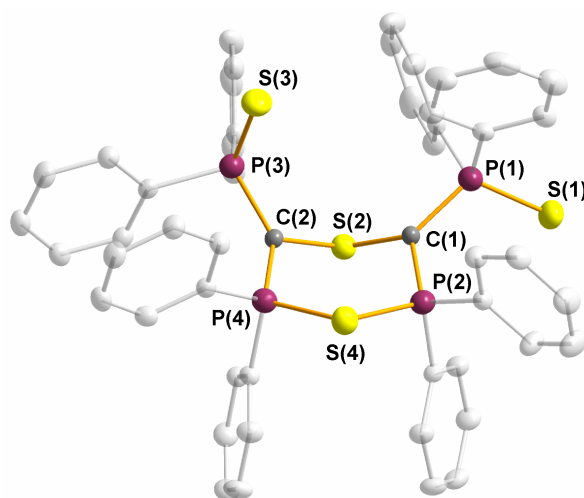

**Figure S2.** Molecular structure of **6**·Et<sub>2</sub>O with 50% thermal ellipsoids. Hydrogen atoms and Et<sub>2</sub>O solvate have been omitted for clarity.
